# Supplementary material for: Left Dorsolateral Prefrontal Cortex Glx/tCr Predicts Efficacy of High Frequency 4- to 6-Week rTMS Treatment and Is Associated With Symptom Improvement in Adults With Major Depressive Disorder: Findings From a Pilot Study
Source: PubMed Central journal article supplement (PMC8677827; doi:10.3389/fpsyt.2021.665347), 2021-12-03
Supplement: Data_Sheet_1.pdf [file Data_Sheet_1.pdf]

## Supplementary Material

### Test-retest of Glx/tCr and GABA/tCr

The test-retest reproducibility of Glx/tCr and GABA/tCr ratio measurements using MEGA-PRESS at Prisma for a  $2 \times 2 \times 2 \text{ cm}^3$  voxel in the IDLPFC was evaluated independently at our center. Five healthy volunteers were scanned with a MEGA-PRESS sequence following the IRB-approved protocol described in Section 2.2 of the main body of the manuscript. Each volunteer was scanned on 2 different days. The time gap between the 2 sessions was initially  $2 \pm 2$  days; however, 2 volunteers had unacceptable motion in their scans and had to return for rescanning, which increased the gap to  $14 \pm 15$  days.

Data analysis for the test-retest cohort was performed following the method described in Section 2.3 of the main body of the manuscript. The scan from 1 of the volunteers who returned for rescanning was still motion corrupted and had to be discarded. Test-retest intraclass coefficient (ICC) and test-retest variability (TRV, within-volunteer variability) were determined following the procedure described by Parsey et al.(1)

For the 4 volunteers with acceptable data, Glx/tCr ratios at the 2 visits were  $0.16 \pm 0.04$  and  $0.17 \pm 0.05$ ; GABA/tCr ratios were  $0.10 \pm 0.03$  and  $0.09 \pm 0.01$ . The ICC for Glx/tCr and GABA/tCr were 0.91 and 0.80 respectively, while the TRV values were 9.2% for Glx/tCr and 16.6% for GABA/tCr.

1. Parsey RV, Slifstein M, Hwang DR, Abi-Dargham A, Simpson N, Mawlawi O, et al. Validation and reproducibility of measurement of 5-HT<sub>1A</sub> receptor parameters with [carbonyl-<sup>11</sup>C]WAY-100635 in humans: comparison of arterial and reference tissue input functions. *J Cereb Blood Flow Metab.* (2000) 20:1111-33. doi: 10.1097/00004647-200007000-00011.
